# Supplementary material
Source: PubMed Central journal article supplement (PMC5411144)
Supplement: supp_pp.16.01940_PP2016-01940DR1_Supplemental_Material_1figs.pdf [file supp_pp.16.01940_PP2016-01940DR1_Supplemental_Material_1figs.pdf]

1 SUPPLEMENTARY FIGURES

2

3 **Figure S1.** Mean ( $\pm$  s.e.) cultivar non-photorespiratory respiration in the light ( $R_d$ ) and apparent  
4 photorespiratory CO<sub>2</sub> compensation points ( $C_i^*$ ), determined from Laisk curves on  $n=5-8$   
5 chamber grown plants.

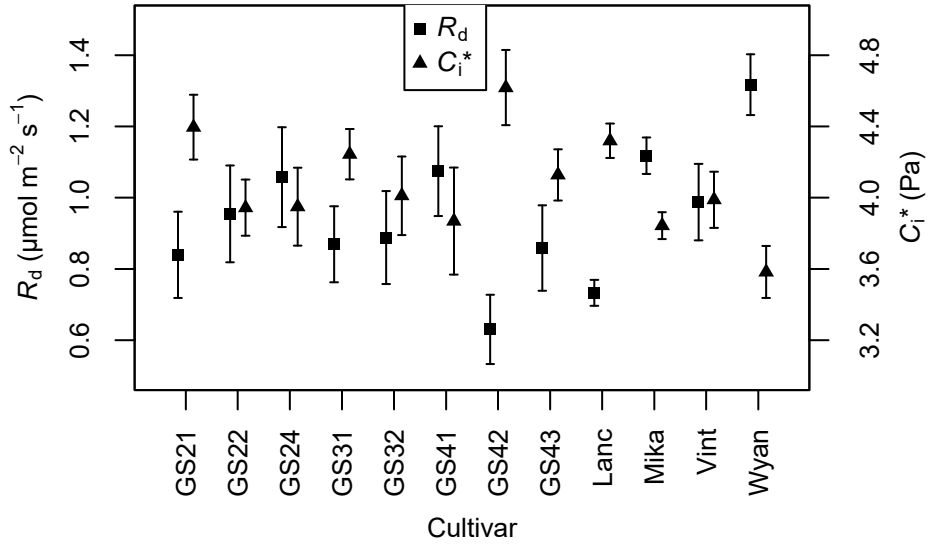

6

7

8

9

10 **Figure S2.** The reliance of mesophyll conductance ( $g_m$ ) estimates on the value of  $\Gamma^*$ .  
 11 Throughout the manuscript the mean  $C_i^*$  value was used as a proxy for the true  $\Gamma^*$ . Here we  
 12 varied mean  $C_i^*$  by  $\pm 15\%$  and re-estimated  $g_m$  for all 12 cultivars used in the controlled  
 13 environment portion of this study. Mesophyll conductance is strongly dependent on  $\Gamma^*$ ,  
 14 increasing with greater values of  $\Gamma^*$  and decreasing with smaller values. Among cultivar  
 15 variance in  $g_m$  is robust to varying  $\Gamma^*$ : subtracting 15% from the mean  $C_i^*$  increases the variance  
 16 attributable to cultivar by 0.13% (from 38.81%), and adding 15% to the mean  $C_i^*$  decreases it by  
 17 1.26%. In all three cases the inclusion of cultivar-identity significantly ( $p < 0.05$ ) increased the  
 18 variance explained.  
 19

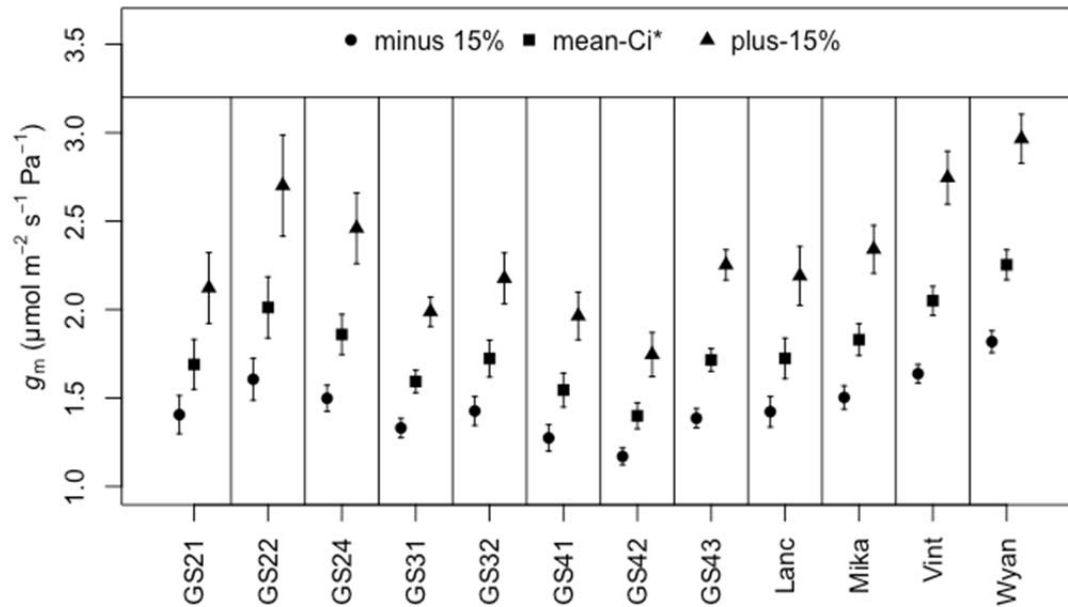

20  
 21

22  
23  
24  
25  
26  
27  
28  
29

**Figure S3.** Comparisons of  $g_m$  calculated using cultivar-specific, and a range of unvarying  $R_d$  estimates for (A) the late-vegetative, (B) early-reproductive, and (C) late-reproductive growth stages of field grown soybean cultivars indicated along the x-axis. When using cultivar-specific  $R_d$  values, 11.6% of the variance in  $g_m$  is attributable to cultivar, and when using an unvarying  $R_d$  (0.5, 1.0, or 1.5) 11.8% of the variance is attributable to cultivar. The small flux of  $R_d$  relative to measured  $A_N$  in this study results in  $g_m$  being nearly unresponsive to  $R_d$ .

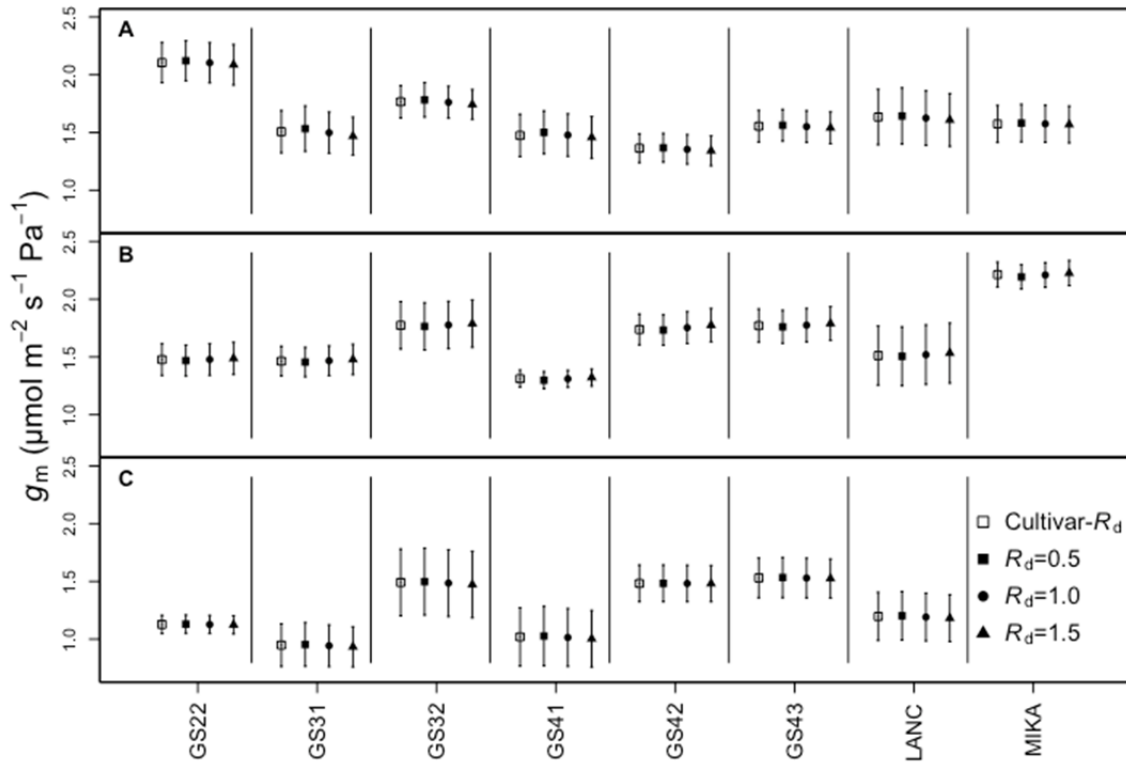

30  
31

32 **Figure S4.** Mean ( $\pm$  s.e.) absorptance ( $\alpha$ ) at 470 and 665 nm for each cultivar from the controlled  
 33 environment experiment (A) and field experiment (B). In A,  $n=5-6$ , and in B  $n=4$  at each cultivar-  
 34 by-growth stage combination except for GS22 where  $n=3$ . Note all leaves in A were sampled at  
 35 the late-vegetative (V<sub>4</sub>-V<sub>5</sub>) growth stage. In B a mean ( $\pm$  s.e.) is presented for each growth  
 36 stage measured on each cultivar: squares are late-vegetative, circles are early-reproductive (R<sub>2</sub>-  
 37 R<sub>4</sub>), and triangles are late-reproductive (R<sub>6</sub>),  
 38  
 39

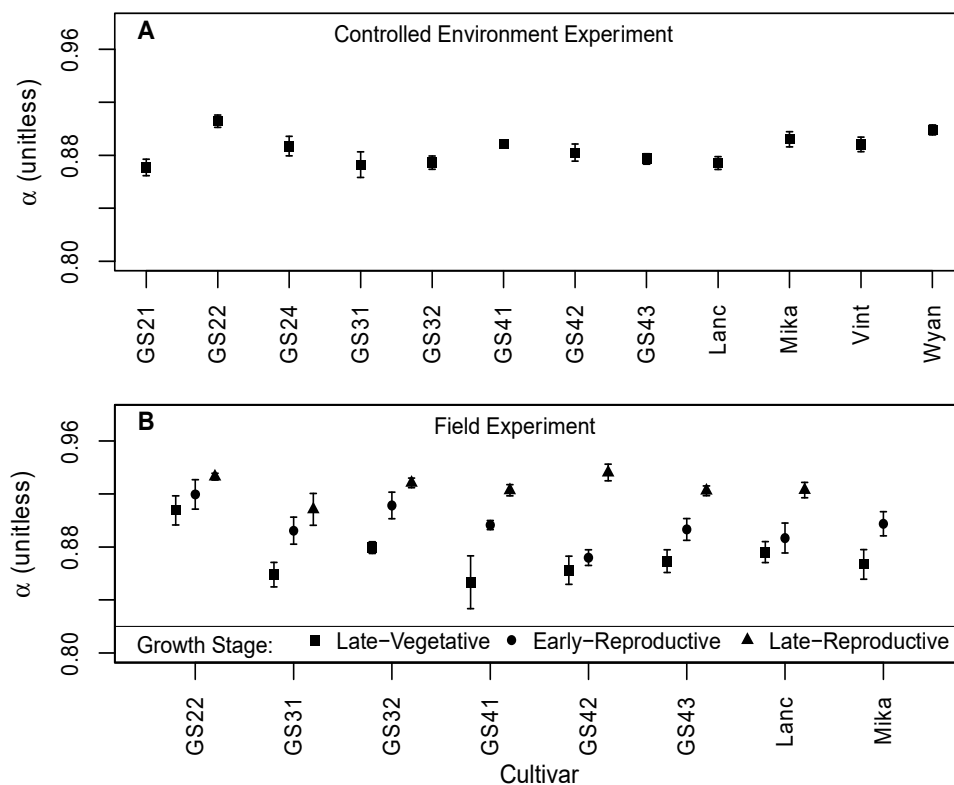

40  
 41  
 42

43 **Figure S5.** Mean (A) light-saturated assimilation ( $A_N$ ), (B) stomatal conductance ( $g_s$ ), (C)  
 44 mesophyll conductance ( $g_m$ ), and (D) calibrated electron transport ( $J_{cal}$ ) for cultivars grown in  
 45 the field. Values are cultivar means ( $\pm$  s.e.) for  $n=4$  replicates, at the late-vegetative (V<sub>4</sub>-V<sub>5</sub>,  
 46 squares), early-reproductive (R<sub>2</sub>-R<sub>4</sub>, circles), and late-reproductive (R<sub>6</sub>, triangles) growth  
 47 stages. Growth stage was a significant fixed effect for  $g_s$  and  $g_m$  ( $p < 0.05$ ), but not for  $A_N$  or  $J_{cal}$   
 48 based on linear mixed models with cultivar-identity and row within the field as random effects.  
 49 Variance due to cultivar was significant ( $p < 0.05$ ) for  $A_N$ ,  $g_s$ ,  $g_m$ , and  $J_{cal}$  according to likelihood  
 50 ratio tests.

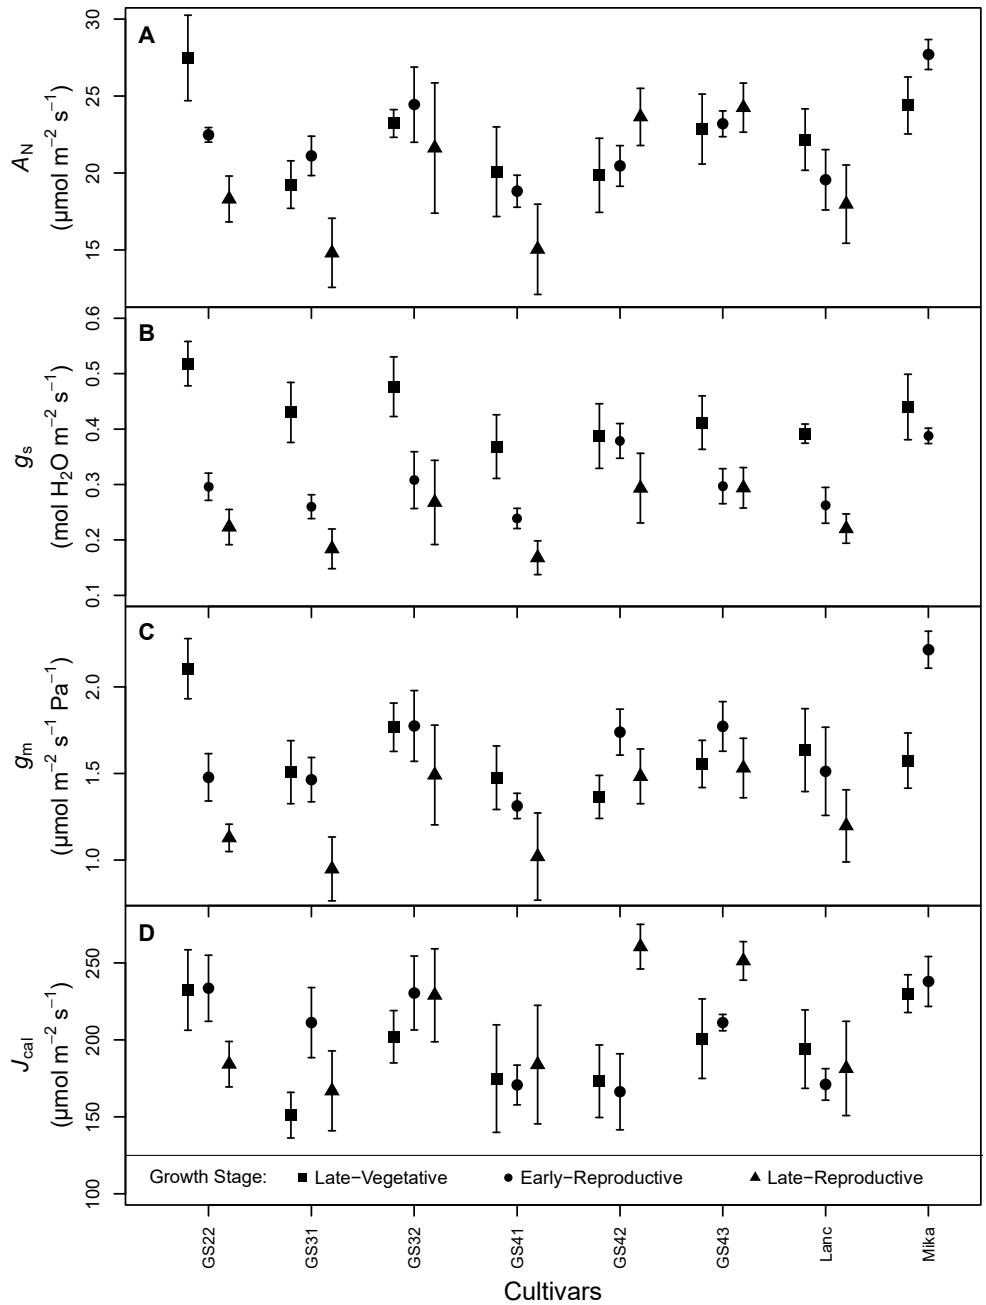

51  
52

53 **Figure S6.** Daily precipitation, 15-day cumulative precipitation, and mean temperature across  
54 the growing season from a meteorological tower located ~200 m from the field experiment.  
55 Mean temperature (black line) was derived from hourly-averaged data. Daily precipitation  
56 (bars) represents the cumulative precipitation for each 24-h Julian day of the year (DOY). A 15-  
57 day moving window of daily-mean precipitation (blue line) is also presented to highlight wet  
58 and dry periods. The red line along the x-axis signifies the date of planting (DOY 155), and the  
59 grey shaded regions signify the dates that leaves were sampled and measured. The final  
60 measurement date was substantially longer than the first two (two-weeks vs. one) due to  
61 blocks reaching the late-reproductive (R6) stage at variable times.

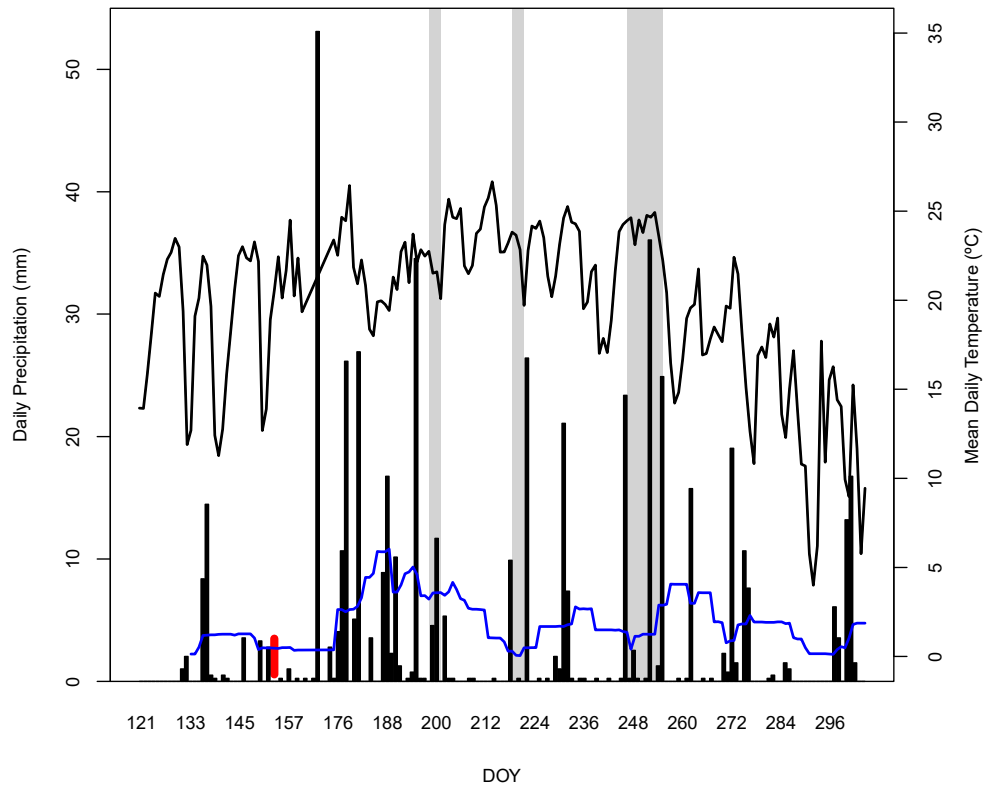

62  
63

64 **Figure S7.** Relationship between (A) intrinsic water-use-efficiency ( $A_N/g_s$ ) and the ratio of  
 65 mesophyll to stomatal conductance to  $\text{CO}_2$  ( $g_m/g_{s-\text{CO}_2}$ ), (B)  $A_N/g_s$  to stomatal conductance to  $\text{CO}_2$   
 66 ( $g_{s-\text{CO}_2}$ ), and (C)  $g_m/g_{s-\text{CO}_2}$  to  $g_{s-\text{CO}_2}$ . Data are from the eight soybean cultivars grown as part of the  
 67 field experiment and measured at three growth stages indicated by symbol shading. Different  
 68 symbols represent different cultivars. Coefficients of determination ( $\Omega_0^2$ ) and regression lines  
 69 are from linear mixed models with the x-variable and growth stage as predictors, and cultivar  
 70 treated as a random effect. In A, the partial correlation ( $r_{xyz}$ ) of  $A_N/g_s$  with  $g_m/g_{s-\text{CO}_2}$  after  
 71 accounting for  $g_s$  is also presented.  
 72

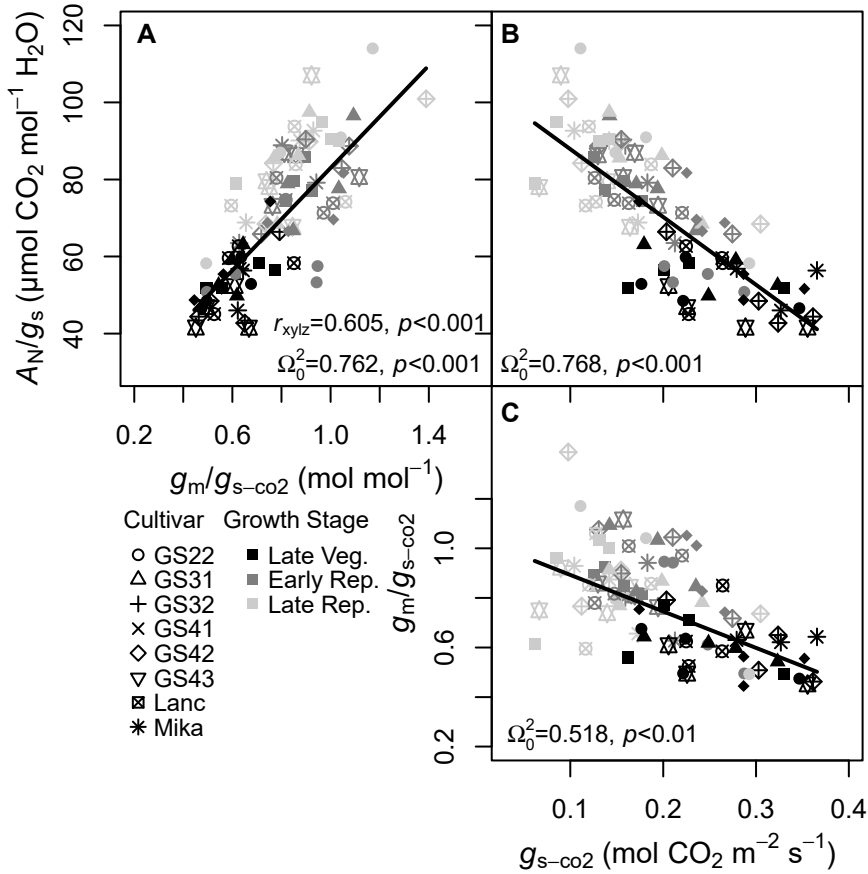

73  
 74  
 75

76 **Figure S8.** Relationships between mesophyll conductance ( $g_m$ ) and (A) leaf mass *per* area  
 77 ( $LMA$ ), (B) leaf thickness ( $L_T$ ), (C) leaf density ( $L_D$ ), and (D) leaf dry matter content ( $LDMC$ ) from  
 78 the field experiment. The three growth stages measured were late-vegetative ( $V_4$ - $V_5$ , black  
 79 symbols), early-reproductive ( $R_2$ - $R_4$ , dark grey), and late-reproductive ( $R_6$ , light grey).  
 80 Different symbols represent different cultivars. Coefficients of determination ( $\Omega_0^2$ ) and  
 81 regression lines are from linear mixed models with the x-variable and growth stage as  
 82 predictors, and cultivar treated as a random effect.

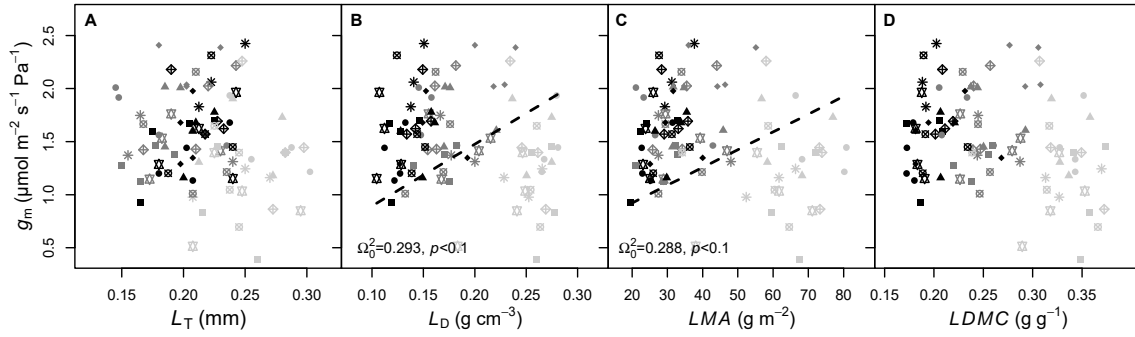

83  
 84  
 85  
 86  
 87
