# Supplementary material
Source: PubMed Central journal article supplement (PMC5411144)
Supplement: supp_pp.16.01940_PP2016-01940DR1_Supplemental_Material_2.pdf [file supp_pp.16.01940_PP2016-01940DR1_Supplemental_Material_2.pdf]

1 **SUPPLEMENTARY TABLES**

2  
 3 **Table S1.** Comparisons of standardized major axis regression slopes from primary bivariate  
 4 relationships presented for all possible comparisons of the three growth stages (Late-Veg.,  
 5 Early-Rep., and Late-Rep.) measured on field-grown plants and those grown in controlled  
 6 growth chambers (Chamber). Pair-wise differences in slopes were assessed by likelihood ratio  
 7 tests with significance corrected for multiple comparisons using the Sidak correction.  
 8 Comparisons with differing slopes are indicated: \* indicates  $p < 0.05$ , \*\*  $p < 0.01$ , and \*\*\*  
 9  $p < 0.001$ .

10

| Slope Comparison: |                | Chamber vs. Late-Veg. | Chamber vs. Early-Rep. | Chamber vs. Late-Rep. | Late-Veg. vs. Early-Rep. | Late-Veg. vs. Late-Rep. | Early-Rep. vs. Late-Rep. |
|-------------------|----------------|-----------------------|------------------------|-----------------------|--------------------------|-------------------------|--------------------------|
| <i>Trait 1</i>    | <i>Trait 2</i> |                       |                        |                       |                          |                         |                          |
| $A_N$             | $g_m$          | *                     |                        | ***                   |                          |                         |                          |
| $A_N$             | $g_s$          |                       |                        | *                     |                          |                         |                          |
| $A_N$             | $J_{cal}$      | ***                   | **                     |                       |                          |                         |                          |
| $g_m$             | $g_{s-co2}$    |                       |                        |                       |                          |                         |                          |
| $g_m$             | $J_{cal}$      | ***                   | *                      | ***                   |                          |                         |                          |
| $A_N/g_s$         | $g_m$          | *                     |                        |                       |                          |                         |                          |
| $g_m$             | <i>LMA</i>     |                       |                        |                       |                          |                         |                          |

11  
 12  
 13  
 14  
 15  
 16  
 17

18 **Table S2.** Cultivars used in this study along with their maturity group status and the source of  
 19 seeds. Abbreviations used on figure axes and in legends are included for clarity. MG is soybean  
 20 maturity group.  
 21

| Cultivar                   | Figure Abbreviations | MG | Seed Source                                  |
|----------------------------|----------------------|----|----------------------------------------------|
| Garden Soy 21              | GS21                 | 2  | NGRP <sup>B</sup>                            |
| Garden Soy 22 <sup>A</sup> | GS22                 | 2  | NGRP                                         |
| Garden Soy 24              | GS24                 | 2  | NGRP                                         |
| Garden Soy 31 <sup>A</sup> | GS31                 | 3  | NGRP                                         |
| Garden Soy 32 <sup>A</sup> | GS32                 | 3  | NGRP                                         |
| Garden Soy 41 <sup>A</sup> | GS41                 | 4  | NGRP                                         |
| Garden Soy 42 <sup>A</sup> | GS42                 | 4  | NGRP                                         |
| Garden Soy 43 <sup>A</sup> | GS43                 | 4  | NGRP                                         |
| Lanco <sup>A</sup>         | Lanc                 | 4  | Southern Exposure Seed Exchange <sup>C</sup> |
| Mikawashima <sup>A</sup>   | Mika                 | 0  | NGRP                                         |
| Vinton 81                  | Vint                 | 2  | Urban Farmer <sup>D</sup>                    |
| Wyandot                    | Wyan                 | 3  | DKG Seed Farms <sup>E</sup>                  |

<sup>A</sup> Designates cultivars used for field plantings. <sup>B</sup>United States Department of Agriculture, Agricultural Research Service, National Genetic Resources Program. <sup>C</sup>Mineral, Virginia, USA. <sup>D</sup>Westfield, Indiana, USA. <sup>E</sup>Orville, OH, USA.

22  
 23  
 24
